# Supplementary material for: Towards the Sustainable Exploitation of Salt-Tolerant Plants: Nutritional Characterisation, Phenolics Composition, and Potential Contaminants Analysis of Salicornia ramosissima and Sarcocornia perennis alpini
Source: MDPI journal article supplement (doi:10.3390/molecules28062726), 2023-03-17
Supplement: s1 [file s1]

## Supplementary Material

**Table S1.** Moisture (% fresh weight (fw)), nutrient composition (% dry weight (dw)), minerals (mg/g dw), and total phenolics content (TPC) (mg of gallic acid equivalents (GAE)/g extract dw) of different *Salicornia* species (data compiled from the literature).

| Parameter                      | <i>S. ramosissima</i>               |                                       |                                              | <i>S. europaea</i>                   |                                     | <i>S. herbacea</i>                        |                                    | <i>S. bigelovii</i> |                                                                  |
|--------------------------------|-------------------------------------|---------------------------------------|----------------------------------------------|--------------------------------------|-------------------------------------|-------------------------------------------|------------------------------------|---------------------|------------------------------------------------------------------|
|                                | Wild;<br>central<br>Portugal<br>[8] | Wild;<br>southern<br>Portugal<br>[12] | Cultivated<br>; southern<br>Portugal<br>[95] | Wild;<br>central<br>Portugal<br>[40] | Wild;<br>northern<br>Serbia<br>[96] | Wild;<br>southwest<br>ern Tunisia<br>[14] | Wild; southeastern Tunisia<br>[97] |                     | Cultivated;<br>western<br>United<br>States of<br>America<br>[98] |
|                                |                                     |                                       |                                              |                                      |                                     |                                           | Region A                           | Region B            |                                                                  |
| <b>Nutrient composition</b>    |                                     |                                       |                                              |                                      |                                     |                                           |                                    |                     |                                                                  |
| Moisture                       | 85.62 ± 0.28                        | 84.5 ± 0.2                            | NA                                           |                                      |                                     | NA                                        | NA                                 | NA                  | NA                                                               |
| Crude protein                  | 4.16 ± 0.71                         | 5.20 ± 0.29                           | NA                                           |                                      |                                     | 22.10 ± 1.28                              | NA                                 | NA                  | 10.2 ± 1.0                                                       |
| Lipids                         | 0.45 ± 0.10                         | 1.87 ± 0.18                           | NA                                           |                                      |                                     | 1.70 ± 0.15                               | 2.20 ± 0.18                        | 4.50 ± 0.23         | NA                                                               |
| Total carbohydrates            | 48.0                                | 63.73 <sup>b</sup>                    | NA                                           |                                      |                                     | 36.17 ± 0.84                              | NA                                 | NA                  | NA                                                               |
| Fibre                          | 10.36 ± 0.74 <sup>a</sup>           | 22.5 <sup>c</sup>                     | NA                                           |                                      |                                     | NA                                        | NA                                 | NA                  | 19.0 ± 0.5 <sup>c</sup>                                          |
| Ash                            | 47.38 ± 0.27                        | 29.2 ± 0.6                            | NA                                           |                                      |                                     | 8.10 ± 0.36                               | 23.50 ± 0.41                       | 40.93 ± 0.63        | 52.70 ± 1.41                                                     |
| <b>Minerals</b>                |                                     |                                       |                                              |                                      |                                     |                                           |                                    |                     |                                                                  |
| Sodium                         | 159.27 ± 0.76                       | 89.9 ± 0.5                            | NA                                           |                                      |                                     | 3.33                                      | 9.00 ± 2.27                        | 14.2 ± 6.23         | 169.2 ± 4.4                                                      |
| Potassium                      | 7.22 ± 0.13                         | 8.92 ± 0.23                           | NA                                           |                                      |                                     | 0.02                                      | 1.58 ± 1.56                        | 1.73 ± 1.54         | NA                                                               |
| Chloride                       | 237.02 ± 1.35                       | NA                                    | NA                                           |                                      |                                     | NA                                        | NA                                 | NA                  | 119.9 ± 20.4                                                     |
| Calcium                        | 2.99 ± 0.00                         | 4.86 ± 0.05                           | NA                                           |                                      |                                     | NA                                        | 1.52 ± 1.43                        | 1.51 ± 1.26         | 7.6 ± 1.4                                                        |
| Phosphorous                    | 0.36 ± 0.00                         | NA                                    | NA                                           |                                      |                                     | 0.31                                      | NA                                 | NA                  | NA                                                               |
| Magnesium                      | 9.01 ± 0.20                         | 9.43 ± 0.08                           | NA                                           |                                      |                                     | TR                                        | 0.45 ± 0.34                        | 0.38 ± 1.67         | 5.8 ± 0.2                                                        |
| <b>Total phenolics content</b> | NA                                  | 33.0 ± 0.7                            | 25.66 ± 2.22                                 | 15.02 ± 2.01                         | 58.20 ± 0.44                        | 53.8 ± 2.6                                | 32.1 ± 0.3                         | 43.1 ± 0.2          | NA                                                               |

<sup>a</sup> Crude fibre determined by Weende method.

<sup>b</sup> Not reported, estimated by difference.

<sup>c</sup> Neutral detergent fibre.

NA – Not analysed; TR – Traces.

**Table S2.** Moisture (% fresh weight (fw)), nutrient composition (% dry weight (dw)), minerals (mg/g dw), and total phenolics content (TPC) (mg of gallic acid equivalents (GAE)/g extract dw) of different *Sarocornia* species (data compiled from the literature).

| Parameter               | <i>S. perennis alpini</i>       | <i>S. perennis perennis</i>     | <i>S. fruticosa</i>          |                                 |                          | <i>S. ambigua</i>       |                    | <i>S. neei</i>           |                           |
|-------------------------|---------------------------------|---------------------------------|------------------------------|---------------------------------|--------------------------|-------------------------|--------------------|--------------------------|---------------------------|
|                         | Wild; southern Portugal<br>[12] | Wild; southern Portugal<br>[12] | Wild; southern Spain<br>[11] | Wild; Southern Portugal<br>[11] | Cultivated<br>[11]       | Southern Brazil<br>[13] |                    | Central Chile<br>[24]    |                           |
|                         |                                 |                                 |                              |                                 |                          | Wild                    | Cultivated         | Wild                     | Cultivated                |
| Nutrient composition    |                                 |                                 |                              |                                 |                          |                         |                    |                          |                           |
| Moisture                | 84.0 ± 1.4                      | 85.8 ± 0.5                      | 84.1 ± 0.4                   | 87.0 ± 0.3                      | 92.0 ± 0.1               | 88.15 ± 0.54            | 88.57 ± 0.60       | 89.78 ± 1.30             | 86.96 ± 1.05              |
| Crude protein           | 8.10 ± 0.06                     | 6.90 ± 0.17                     | 9.25 ± 0.03                  | 9.55 ± 0.04                     | 12.6 ± 0.62              | 16.29 ± 0.17            | 18.02 ± 0.09       | 13.50 ± 1.76             | 6.98 ± 0.31               |
| Lipids                  | 1.20 ± 0.09                     | 2.25 ± 0.05                     | 4.45 ± 0.06                  | 4.41 ± 0.05                     | 5.60 ± 0.15              | 1.35 ± 0.08             | 1.05 ± 0.79        | 1.08 ± 0.59              | 1.07 ± 0.31               |
| Total carbohydrates     | 60 <sup>a</sup>                 | 67.6 <sup>a</sup>               | 57.4 <sup>a</sup>            | 48.7 <sup>a</sup>               | 38.5 <sup>a</sup>        | 29.96                   | 27.47              | 49.61 <sup>a</sup>       | 56.21 <sup>a</sup>        |
| Fibre                   | 20.8 <sup>b</sup>               | 34.1 <sup>b</sup>               | 22.0 ± 0.00 <sub>c</sub>     | 16.6 ± 0.01 <sub>c</sub>        | 9.26 ± 0.01 <sup>c</sup> | ~23.2 <sup>c</sup>      | ~17.2 <sup>c</sup> | 9.98 ± 3.52 <sup>d</sup> | 16.95 ± 1.76 <sup>d</sup> |
| Ash                     | 30.7 ± 1.1                      | 23.3 ± 0.3                      | 28.9 ± 0.1                   | 37.3 ± 0.0                      | 43.3 ± 0.1               | 24.98 ± 11.05           | 31.85 ± 10.59      | 35.81 ± 1.96             | 35.74 ± 0.84              |
| Minerals                |                                 |                                 |                              |                                 |                          |                         |                    |                          |                           |
| Sodium                  | 64.3 ± 0.9                      | 64.1 ± 0.9                      | 243 ± 6                      | 253 ± 14                        | 297 ± 4                  | 85.99 ± 44.73           | 144.97 ± 15.75     | 80.7 ± 4.7               | 100.1 ± 6.9               |
| Potassium               | 10.3 ± 0.1                      | 13.9 ± 0.1                      | 62.4 ± 1.1                   | 49.6 ± 0.5                      | 87.5 ± 1.0               | 24.47 ± 9.28            | 15.84 ± 0.87       | 20.3 ± 0.9               | 15.5 ± 0.9                |
| Chloride                | NA                              | NA                              | NA                           | NA                              | NA                       | NA                      | NA                 | 155.8 ± 7.3              | 150 ± 19.5                |
| Calcium                 | 2.63 ± 0.01                     | 2.34 ± 0.01                     | 24.7 ± 0.6                   | 21.3 ± 1.1                      | 17.8 ± 0.1               | 4.56 ± 34.60            | 4.64 ± 1.75        | 6.3 ± 0.7                | 5.3 ± 0.5                 |
| Phosphorous             | NA                              | NA                              | NA                           | NA                              | NA                       | NA                      | NA                 | 1.8 ± 0.2                | 1.6 ± 0.2                 |
| Magnesium               | 7.03 ± 0.04                     | 6.73 ± 0.08                     | 59.2 ± 0.7                   | 28.7 ± 0.9                      | 17.4 ± 0.3               | 7.76 ± 4.22             | 11.37 ± 0.87       | 11.3 ± 1.6               | 8.2 ± 0.8                 |
| Total phenolics content | 20.7 ± 0.5                      | 20.5 ± 0.5                      | 5.69 ± 0.06                  | 5.12 ± 0.07                     | 4.10 ± 0.0               | NA                      | NA                 | 6.13 ± 0.24              | 2.85 ± 0.24               |

<sup>a</sup> Not reported, estimated by difference.<sup>b</sup> Neutral detergent fibre.<sup>c</sup> Total dietary fibre.<sup>d</sup> Crude fibre.

NA – Not analysed.
